# Supplementary material
Source: publisher figshare collection journal article supplement (https://gsajournals.figshare.com/ndownloader/files/13192319)
Supplement: Supplementary file 1 [file 13192319]

## Sheet: prp4ka All genes affected
	Reference list	Client Text Box Input
Mapped IDs:	27502 out of 27502	2670 out of 2693
Unmapped IDs:	0	98
Multiple mapping information:	0	50
	Arabidopsis thaliana (REF)	Client Text Box Input
PANTHER GO-Slim Biological Process	#	#	expected	Fold Enrichment	+/-	raw P value	FDR
immune response (GO:0006955)	19	8	1.86	4.3	+	0.00187	0.0207
immune system process (GO:0002376)	19	8	1.86	4.3	+	0.00187	0.0195
gluconeogenesis (GO:0006094)	17	7	1.66	4.21	+	0.00395	0.031
endocytosis (GO:0006897)	177	37	17.33	2.13	+	9.12e-05	0.00214
RNA splicing, via transesterification reactions (GO:0000375)	202	40	19.78	2.02	+	0.000149	0.00255
mRNA processing (GO:0006397)	310	60	30.36	1.98	+	5.51e-06	0.000518
mRNA splicing, via spliceosome (GO:0000398)	224	42	21.93	1.91	+	0.000306	0.00442
vesicle-mediated transport (GO:0016192)	520	80	50.92	1.57	+	0.000281	0.00441
intracellular signal transduction (GO:0035556)	445	67	43.57	1.54	+	0.00167	0.0196
protein transport (GO:0015031)	600	87	58.75	1.48	+	0.000875	0.0118
intracellular protein transport (GO:0006886)	568	81	55.62	1.46	+	0.00212	0.0199
signal transduction (GO:0007165)	704	98	68.94	1.42	+	0.00134	0.0168
cell communication (GO:0007154)	756	103	74.03	1.39	+	0.00193	0.0191
response to stimulus (GO:0050896)	1690	228	165.49	1.38	+	6.1e-06	0.000287
transport (GO:0006810)	1441	193	141.1	1.37	+	4.74e-05	0.00127
response to stress (GO:0006950)	799	106	78.24	1.35	+	0.00367	0.03
phosphate-containing compound metabolic process (GO:0006796)	1688	222	165.29	1.34	+	3.88e-05	0.00121
localization (GO:0051179)	1580	206	154.71	1.33	+	0.000114	0.00214
metabolic process (GO:0008152)	6924	787	678	1.16	+	5.62e-06	0.000352
cellular process (GO:0009987)	6866	765	672.32	1.14	+	0.000104	0.00217
Unclassified (UNCLASSIFIED)	18178	1627	1779.99	0.91	-	4.37e-09	8.21e-07
cellular component biogenesis (GO:0044085)	790	51	77.36	0.66	-	0.00258	0.0231
tRNA metabolic process (GO:0006399)	143	4	14	0.29	-	0.00522	0.0393
DNA replication (GO:0006260)	129	3	12.63	0.24	-	0.00334	0.0286
rRNA metabolic process (GO:0016072)	148	1	14.49	0.07	-	3.21e-05	0.00121
	Arabidopsis thaliana (REF)	Client Text Box Input
PANTHER GO-Slim Molecular Function	#	#	expected	Fold Enrichment	+/-	raw P value	FDR
extracellular matrix structural constituent (GO:0005201)	12	6	1.18	5.11	+	0.00362	0.0517
peroxidase activity (GO:0004601)	66	21	6.46	3.25	+	1.95e-05	0.000438
antioxidant activity (GO:0016209)	86	23	8.42	2.73	+	0.000116	0.00228
lipase activity (GO:0016298)	51	13	4.99	2.6	+	0.00381	0.0499
mRNA binding (GO:0003729)	177	42	17.33	2.42	+	2.01e-06	6.3e-05
kinase activity (GO:0016301)	724	119	70.89	1.68	+	5.79e-07	2.27e-05
protein kinase activity (GO:0004672)	508	80	49.74	1.61	+	0.000137	0.0024
transferase activity (GO:0016740)	1902	254	186.24	1.36	+	3.53e-06	9.24e-05
oxidoreductase activity (GO:0016491)	1141	151	111.73	1.35	+	0.000565	0.00887
catalytic activity (GO:0003824)	5737	724	561.77	1.29	+	1.23e-12	1.93e-10
Unclassified (UNCLASSIFIED)	18253	1609	1787.34	0.9	-	8.02e-12	6.29e-10
structural constituent of ribosome (GO:0003735)	264	4	25.85	0.15	-	4.6e-07	2.41e-05
	Arabidopsis thaliana (REF)	Client Text Box Input
PANTHER Protein Class	#	#	expected	Fold Enrichment	+/-	raw P value	FDR
mRNA processing factor (PC00147)	205	52	20.07	2.59	+	1.78e-08	1.57e-06
mRNA splicing factor (PC00148)	150	37	14.69	2.52	+	3.69e-06	0.00013
non-receptor serine/threonine protein kinase (PC00167)	207	40	20.27	1.97	+	0.000276	0.00809
Unclassified (UNCLASSIFIED)	19939	1819	1952.43	0.93	-	7.35e-08	4.31e-06
ribosomal protein (PC00202)	322	4	31.53	0.13	-	3.97e-09	6.98e-07
serine/threonine protein kinase receptor (PC00205)	206	2	20.17	0.1	-	1.86e-06	8.2e-05
	Arabidopsis thaliana (REF)	Client Text Box Input
GO cellular component complete	#	#	expected	Fold Enrichment	+/-	raw P value	FDR
nuclear speck (GO:0016607)	84	23	8.23	2.8	+	5.83e-05	0.00481
spliceosomal complex (GO:0005681)	159	40	15.57	2.57	+	1.03e-06	0.000122
plastoglobule (GO:0010287)	82	20	8.03	2.49	+	0.000688	0.0351
nuclear body (GO:0016604)	113	27	11.06	2.44	+	0.000132	0.00945
microbody (GO:0042579)	247	43	24.19	1.78	+	0.000869	0.0333
peroxisome (GO:0005777)	247	43	24.19	1.78	+	0.000869	0.0321
nucleoplasm part (GO:0044451)	414	65	40.54	1.6	+	0.000653	0.035
plant-type cell wall (GO:0009505)	381	59	37.31	1.58	+	0.00172	0.0526
nucleoplasm (GO:0005654)	518	80	50.72	1.58	+	0.000271	0.0171
cytosol (GO:0005829)	2289	340	224.14	1.52	+	8.21e-13	2.93e-10
apoplast (GO:0048046)	496	73	48.57	1.5	+	0.00174	0.0517
plasma membrane (GO:0005886)	3912	558	383.06	1.46	+	4.1e-18	2.19e-15
cell periphery (GO:0071944)	4562	637	446.71	1.43	+	5.07e-19	5.43e-16
external encapsulating structure (GO:0030312)	778	106	76.18	1.39	+	0.0018	0.0506
cell wall (GO:0005618)	778	106	76.18	1.39	+	0.0018	0.0493
plasmodesma (GO:0009506)	1012	136	99.1	1.37	+	0.000706	0.0344
symplast (GO:0055044)	1012	136	99.1	1.37	+	0.000706	0.0329
cell-cell junction (GO:0005911)	1014	136	99.29	1.37	+	0.000715	0.0319
cell junction (GO:0030054)	1014	136	99.29	1.37	+	0.000715	0.0306
whole membrane (GO:0098805)	1006	134	98.51	1.36	+	0.000997	0.0356
vacuole (GO:0005773)	1129	149	110.55	1.35	+	0.000759	0.0313
endomembrane system (GO:0012505)	2305	275	225.71	1.22	+	0.00147	0.0493
membrane (GO:0016020)	8477	1008	830.07	1.21	+	3.71e-12	9.93e-10
nucleus (GO:0005634)	9858	1058	965.3	1.1	+	0.000414	0.0246
cytoplasm (GO:0005737)	13346	1427	1306.84	1.09	+	1.06e-05	0.00103
cell part (GO:0044464)	22071	2292	2161.2	1.06	+	4.12e-10	6.3e-08
cell (GO:0005623)	22072	2292	2161.29	1.06	+	4.12e-10	5.52e-08
intracellular (GO:0005622)	20080	2046	1966.24	1.04	+	0.000863	0.0342
intracellular part (GO:0044424)	20055	2041	1963.79	1.04	+	0.00131	0.0452
mitochondrion (GO:0005739)	3426	222	335.47	0.66	-	2.43e-11	5.19e-09
mitochondrial protein complex (GO:0098798)	255	10	24.97	0.4	-	0.00159	0.0515
large ribosomal subunit (GO:0015934)	204	3	19.98	0.15	-	1.22e-05	0.00109
cytosolic large ribosomal subunit (GO:0022625)	149	2	14.59	0.14	-	0.000153	0.0103
ribosomal subunit (GO:0044391)	341	3	33.39	0.09	-	1.12e-10	2.01e-08
cytosolic small ribosomal subunit (GO:0022627)	108	0	10.58	< 0.01	-	6.36e-05	0.00487
preribosome (GO:0030684)	87	0	8.52	< 0.01	-	0.000491	0.0277
NADH dehydrogenase complex (GO:0030964)	76	0	7.44	< 0.01	-	0.00176	0.051
small ribosomal subunit (GO:0015935)	135	0	13.22	< 0.01	-	5.55e-06	0.000595
respiratory chain complex I (GO:0045271)	74	0	7.25	< 0.01	-	0.00168	0.0529

## Sheet: prp4ka DEGs
	Reference list	Client Text Box Input
Mapped IDs:	27502 out of 27502	1515 out of 1528
Unmapped IDs:	0	56
Multiple mapping information:	0	15
	Arabidopsis thaliana (REF)	Client Text Box Input
PANTHER GO-Slim Biological Process	#	#	expected	Fold Enrichment	+/-	raw P value	FDR
response to stress (GO:0006950)	799	72	44.39	1.62	+	0.00015	0.00942
response to stimulus (GO:0050896)	1690	133	93.9	1.42	+	0.000142	0.0134
organelle organization (GO:0006996)	938	26	52.11	0.5	-	0.000124	0.0234
	Arabidopsis thaliana (REF)	Client Text Box Input
PANTHER GO-Slim Molecular Function	#	#	expected	Fold Enrichment	+/-	raw P value	FDR
extracellular matrix structural constituent (GO:0005201)	12	6	0.67	9	+	0.000226	0.00507
peroxidase activity (GO:0004601)	66	16	3.67	4.36	+	4.96e-06	0.000778
antioxidant activity (GO:0016209)	86	18	4.78	3.77	+	7.69e-06	0.000403
transferase activity, transferring glycosyl groups (GO:0016757)	342	39	19	2.05	+	7.17e-05	0.00225
sequence-specific DNA binding RNA polymerase II transcription factor activity (GO:0000981)	277	29	15.39	1.88	+	0.00269	0.0351
protein kinase activity (GO:0004672)	508	45	28.22	1.59	+	0.00378	0.0456
transmembrane transporter activity (GO:0022857)	858	75	47.67	1.57	+	0.000321	0.00561
transporter activity (GO:0005215)	996	83	55.34	1.5	+	0.000627	0.00984
kinase activity (GO:0016301)	724	60	40.23	1.49	+	0.00435	0.0456
transferase activity (GO:0016740)	1902	152	105.67	1.44	+	1.96e-05	0.000771
oxidoreductase activity (GO:0016491)	1141	90	63.39	1.42	+	0.00169	0.0241
catalytic activity (GO:0003824)	5737	395	318.75	1.24	+	5.48e-06	0.00043
Unclassified (UNCLASSIFIED)	18253	944	1014.13	0.93	-	0.000273	0.00535
RNA binding (GO:0003723)	739	23	41.06	0.56	-	0.00384	0.0431
structural constituent of ribosome (GO:0003735)	264	2	14.67	0.14	-	0.000142	0.00372
	Arabidopsis thaliana (REF)	Client Text Box Input
PANTHER Protein Class	#	#	expected	Fold Enrichment	+/-	raw P value	FDR
extracellular matrix structural protein (PC00103)	12	6	0.67	9	+	0.000226	0.00795
nucleic acid binding (PC00171)	1771	62	98.4	0.63	-	9.64e-05	0.00424
RNA binding protein (PC00031)	1115	31	61.95	0.5	-	2.56e-05	0.00225
ribosomal protein (PC00202)	322	2	17.89	0.11	-	7.66e-06	0.00135
serine/threonine protein kinase receptor (PC00205)	206	0	11.45	< 0.01	-	2.6e-05	0.00153
	Arabidopsis thaliana (REF)	Client Text Box Input
GO cellular component complete	#	#	expected	Fold Enrichment	+/-	raw P value	FDR
Casparian strip (GO:0048226)	11	6	0.61	9.82	+	0.000158	0.00691
external encapsulating structure part (GO:0044462)	14	6	0.78	7.71	+	0.000431	0.0154
cell wall part (GO:0044426)	14	6	0.78	7.71	+	0.000431	0.0148
secondary cell wall (GO:0009531)	16	6	0.89	6.75	+	0.000757	0.0221
plant-type cell wall (GO:0009505)	328	52	18.22	2.85	+	3.04e-10	7.34e-08
integral component of plasma membrane (GO:0005887)	187	23	10.39	2.21	+	0.000883	0.0243
external encapsulating structure (GO:0030312)	703	77	39.06	1.97	+	1.35e-07	1.44e-05
cell wall (GO:0005618)	703	77	39.06	1.97	+	1.35e-07	1.3e-05
cell periphery (GO:0071944)	4199	359	233.29	1.54	+	3.06e-16	2.95e-13
plasma membrane (GO:0005886)	3627	297	201.51	1.47	+	4.06e-11	1.96e-08
integral component of membrane (GO:0016021)	4798	365	266.57	1.37	+	6.8e-10	1.31e-07
intrinsic component of membrane (GO:0031224)	5010	378	278.35	1.36	+	6.91e-10	1.11e-07
extracellular region (GO:0005576)	2840	214	157.79	1.36	+	1.19e-05	0.000765
membrane part (GO:0044425)	5435	393	301.97	1.3	+	4e-08	4.83e-06
membrane (GO:0016020)	8055	554	447.53	1.24	+	1.16e-08	1.6e-06
intracellular membrane-bounded organelle (GO:0043231)	17100	864	950.07	0.91	-	1.3e-05	0.000783
membrane-bounded organelle (GO:0043227)	17166	865	953.74	0.91	-	6.75e-06	0.000501
organelle (GO:0043226)	17411	877	967.35	0.91	-	4.13e-06	0.000332
intracellular organelle (GO:0043229)	17402	876	966.85	0.91	-	3.64e-06	0.000319
cytoplasmic part (GO:0044444)	10187	504	565.99	0.89	-	0.0013	0.0349
plastid (GO:0009536)	3976	178	220.9	0.81	-	0.00207	0.0499
organelle part (GO:0044422)	4628	202	257.13	0.79	-	0.00018	0.00757
intracellular organelle part (GO:0044446)	4617	200	256.52	0.78	-	0.000116	0.00588
macromolecular complex (GO:0032991)	2355	90	130.84	0.69	-	0.000149	0.00686
intracellular non-membrane-bounded organelle (GO:0043232)	1404	52	78.01	0.67	-	0.00211	0.0497
non-membrane-bounded organelle (GO:0043228)	1404	52	78.01	0.67	-	0.00211	0.0485
chloroplast part (GO:0044434)	1384	45	76.89	0.59	-	0.000122	0.00589
plastid part (GO:0044435)	1415	45	78.62	0.57	-	5.27e-05	0.00299
mitochondrion (GO:0005739)	3312	105	184.01	0.57	-	9.56e-11	3.08e-08
envelope (GO:0031975)	1120	35	62.23	0.56	-	0.000267	0.0107
organelle envelope (GO:0031967)	1120	35	62.23	0.56	-	0.000267	0.0103
plastid stroma (GO:0009532)	755	22	41.95	0.52	-	0.0014	0.0366
plastid envelope (GO:0009526)	684	18	38	0.47	-	0.000576	0.0185
chloroplast envelope (GO:0009941)	664	17	36.89	0.46	-	0.000476	0.0159
thylakoid (GO:0009579)	573	13	31.84	0.41	-	0.000343	0.0127
chloroplast thylakoid (GO:0009534)	498	11	27.67	0.4	-	0.000614	0.0191
plastid thylakoid (GO:0031976)	499	11	27.72	0.4	-	0.000615	0.0186
thylakoid membrane (GO:0042651)	410	9	22.78	0.4	-	0.00193	0.0491
photosynthetic membrane (GO:0034357)	411	9	22.83	0.39	-	0.00193	0.0479
ribosome (GO:0005840)	441	9	24.5	0.37	-	0.00086	0.0244
membrane protein complex (GO:0098796)	523	10	29.06	0.34	-	0.000114	0.0061
ribosomal subunit (GO:0044391)	275	1	15.28	0.07	-	8.95e-06	0.000617

## Sheet: prp4ka DAS genes
	Reference list	Client Text Box Input
Mapped IDs:	27502 out of 27502	1177 out of 1189
Unmapped IDs:	0	48
Multiple mapping information:	0	14
	Arabidopsis thaliana (REF)	Client Text Box Input
PANTHER GO-Slim Biological Process	#	#	expected	Fold Enrichment	+/-	raw P value	FDR
mRNA polyadenylation (GO:0006378)	29	7	1.25	5.58	+	0.000599	0.00939
mRNA 3'-end processing (GO:0031124)	38	8	1.64	4.87	+	0.000545	0.00932
RNA splicing, via transesterification reactions (GO:0000375)	202	26	8.73	2.98	+	3.25e-06	0.000122
mRNA processing (GO:0006397)	310	39	13.4	2.91	+	2.21e-08	2.08e-06
mRNA splicing, via spliceosome (GO:0000398)	224	27	9.68	2.79	+	6.4e-06	0.0002
intracellular signal transduction (GO:0035556)	445	37	19.24	1.92	+	0.000317	0.00595
phosphate-containing compound metabolic process (GO:0006796)	1688	106	72.98	1.45	+	0.000231	0.00482
transport (GO:0006810)	1441	90	62.3	1.44	+	0.000941	0.0136
localization (GO:0051179)	1580	97	68.31	1.42	+	0.000986	0.0132
nucleobase-containing compound metabolic process (GO:0006139)	2727	162	117.9	1.37	+	6.44e-05	0.00173
primary metabolic process (GO:0044238)	5340	309	230.87	1.34	+	7.51e-08	4.7e-06
metabolic process (GO:0008152)	6924	395	299.35	1.32	+	1.33e-09	2.49e-07
cellular process (GO:0009987)	6866	355	296.84	1.2	+	0.000196	0.00461
Unclassified (UNCLASSIFIED)	18178	697	785.89	0.89	-	1.5e-07	7.06e-06
	Arabidopsis thaliana (REF)	Client Text Box Input
PANTHER GO-Slim Molecular Function	#	#	expected	Fold Enrichment	+/-	raw P value	FDR
poly(A) RNA binding (GO:0008143)	9	4	0.39	10.28	+	0.00155	0.0348
mRNA binding (GO:0003729)	177	26	7.65	3.4	+	3.53e-07	5.54e-05
lyase activity (GO:0016829)	255	23	11.02	2.09	+	0.00201	0.0351
kinase activity (GO:0016301)	724	56	31.3	1.79	+	7.66e-05	0.003
transferase activity (GO:0016740)	1902	112	82.23	1.36	+	0.0014	0.0441
catalytic activity (GO:0003824)	5737	319	248.03	1.29	+	1.58e-06	8.29e-05
binding (GO:0005488)	3418	186	147.77	1.26	+	0.00149	0.0389
Unclassified (UNCLASSIFIED)	18253	705	789.14	0.89	-	6.34e-07	4.98e-05
structural constituent of ribosome (GO:0003735)	264	2	11.41	0.18	-	0.00174	0.0341
	Arabidopsis thaliana (REF)	Client Text Box Input
PANTHER Protein Class	#	#	expected	Fold Enrichment	+/-	raw P value	FDR
amylase (PC00048)	10	4	0.43	9.25	+	0.0021	0.037
mRNA splicing factor (PC00148)	150	25	6.48	3.86	+	7.02e-08	4.12e-06
mRNA processing factor (PC00147)	205	34	8.86	3.84	+	3.68e-10	6.47e-08
non-receptor serine/threonine protein kinase (PC00167)	207	22	8.95	2.46	+	0.000294	0.00861
kinase (PC00137)	606	45	26.2	1.72	+	0.000928	0.0181
hydrolase (PC00121)	1619	103	69.99	1.47	+	0.000174	0.00768
transferase (PC00220)	1342	85	58.02	1.47	+	0.000808	0.0178
Unclassified (UNCLASSIFIED)	19939	765	862.03	0.89	-	2.01e-09	1.77e-07
ribosomal protein (PC00202)	322	2	13.92	0.14	-	0.000211	0.00742
serine/threonine protein kinase receptor (PC00205)	206	0	8.91	< 0.01	-	0.0003	0.00755
	Arabidopsis thaliana (REF)	Client Text Box Input
GO cellular component complete	#	#	expected	Fold Enrichment	+/-	raw P value	FDR
U2-type prespliceosome (GO:0071004)	11	5	0.48	10.51	+	0.000361	0.0218
prespliceosome (GO:0071010)	14	5	0.61	8.26	+	0.000867	0.0348
nuclear speck (GO:0016607)	67	17	2.9	5.87	+	5.18e-08	1.67e-05
nuclear body (GO:0016604)	94	20	4.06	4.92	+	4.5e-08	2.17e-05
spliceosomal complex (GO:0005681)	100	21	4.32	4.86	+	2.54e-08	2.45e-05
Sm-like protein family complex (GO:0120114)	39	8	1.69	4.74	+	0.000633	0.0291
nucleoplasm part (GO:0044451)	267	31	11.54	2.69	+	2.76e-06	0.000532
nucleoplasm (GO:0005654)	334	34	14.44	2.35	+	1.52e-05	0.00146
nuclear part (GO:0044428)	1030	75	44.53	1.68	+	2.88e-05	0.00214
nuclear lumen (GO:0031981)	804	56	34.76	1.61	+	0.000903	0.0348
plasma membrane (GO:0005886)	3627	202	156.81	1.29	+	0.000249	0.016
organelle part (GO:0044422)	4628	245	200.08	1.22	+	0.000911	0.0338
intracellular organelle part (GO:0044446)	4617	244	199.61	1.22	+	0.00104	0.037
nucleus (GO:0005634)	9500	483	410.72	1.18	+	2.01e-05	0.00176
intracellular part (GO:0044424)	19440	914	840.45	1.09	+	2.99e-06	0.000481
intracellular (GO:0005622)	19474	915	841.92	1.09	+	3.4e-06	0.000469
intracellular membrane-bounded organelle (GO:0043231)	17100	798	739.29	1.08	+	0.000547	0.0278
membrane-bounded organelle (GO:0043227)	17166	801	742.14	1.08	+	0.000537	0.0288
intracellular organelle (GO:0043229)	17402	811	752.34	1.08	+	0.000506	0.0287
organelle (GO:0043226)	17411	811	752.73	1.08	+	0.000565	0.0273
cell part (GO:0044464)	21355	988	923.25	1.07	+	5.69e-06	0.000686
cell (GO:0005623)	21357	988	923.33	1.07	+	6.65e-06	0.000713
extracellular region (GO:0005576)	2840	74	122.78	0.6	-	1.42e-06	0.000342
external encapsulating structure (GO:0030312)	703	13	30.39	0.43	-	0.000805	0.0353
cell wall (GO:0005618)	703	13	30.39	0.43	-	0.000805	0.0338
ribosomal subunit (GO:0044391)	275	1	11.89	0.08	-	0.000196	0.0135
plant-type cell wall (GO:0009505)	328	1	14.18	0.07	-	2.06e-05	0.00166

## Sheet: prp4ka IR
	Reference list	Client Text Box Input
Mapped IDs:	27502 out of 27502	945 out of 953
Unmapped IDs:	0	43
Multiple mapping information:	0	10
	Arabidopsis thaliana (REF)	Client Text Box Input
PANTHER GO-Slim Biological Process	#	#	expected	Fold Enrichment	+/-	raw P value	FDR
mRNA polyadenylation (GO:0006378)	29	7	1	6.97	+	0.000165	0.0062
mRNA 3'-end processing (GO:0031124)	38	7	1.32	5.32	+	0.000691	0.013
pyrimidine nucleobase metabolic process (GO:0006206)	34	6	1.18	5.09	+	0.00201	0.0316
mRNA processing (GO:0006397)	310	30	10.74	2.79	+	1.62e-06	0.000152
RNA splicing, via transesterification reactions (GO:0000375)	202	19	7	2.71	+	0.000177	0.00555
mRNA splicing, via spliceosome (GO:0000398)	224	20	7.76	2.58	+	0.000229	0.00616
intracellular signal transduction (GO:0035556)	445	31	15.42	2.01	+	0.000444	0.00927
phosphate-containing compound metabolic process (GO:0006796)	1688	83	58.49	1.42	+	0.00208	0.03
nucleobase-containing compound metabolic process (GO:0006139)	2727	130	94.5	1.38	+	0.000289	0.0068
primary metabolic process (GO:0044238)	5340	241	185.04	1.3	+	1.28e-05	0.0006
metabolic process (GO:0008152)	6924	309	239.93	1.29	+	8.25e-07	0.000155
cellular process (GO:0009987)	6866	281	237.92	1.18	+	0.00183	0.0312
Unclassified (UNCLASSIFIED)	18178	561	629.9	0.89	-	5.15e-06	0.000323
	Arabidopsis thaliana (REF)	Client Text Box Input
PANTHER GO-Slim Molecular Function	#	#	expected	Fold Enrichment	+/-	raw P value	FDR
poly(A) RNA binding (GO:0008143)	9	4	0.31	12.83	+	0.000702	0.022
mRNA binding (GO:0003729)	177	20	6.13	3.26	+	1.14e-05	0.00178
kinase activity (GO:0016301)	724	46	25.09	1.83	+	0.000155	0.00811
catalytic activity (GO:0003824)	5737	244	198.8	1.23	+	0.000578	0.0227
Unclassified (UNCLASSIFIED)	18253	574	632.5	0.91	-	0.000109	0.00855
	Arabidopsis thaliana (REF)	Client Text Box Input
PANTHER Protein Class	#	#	expected	Fold Enrichment	+/-	raw P value	FDR
mRNA polyadenylation factor (PC00146)	21	5	0.73	6.87	+	0.00153	0.0384
nucleotide kinase (PC00172)	59	8	2.04	3.91	+	0.00175	0.0384
mRNA processing factor (PC00147)	205	27	7.1	3.8	+	2.13e-08	3.74e-06
mRNA splicing factor (PC00148)	150	19	5.2	3.66	+	4.27e-06	0.000251
non-receptor serine/threonine protein kinase (PC00167)	207	17	7.17	2.37	+	0.002	0.0392
kinase (PC00137)	606	36	21	1.71	+	0.00259	0.0456
hydrolase (PC00121)	1619	82	56.1	1.46	+	0.00104	0.0365
Unclassified (UNCLASSIFIED)	19939	614	690.93	0.89	-	8.98e-08	7.91e-06
ribosomal protein (PC00202)	322	1	11.16	0.09	-	0.000448	0.0197
serine/threonine protein kinase receptor (PC00205)	206	0	7.14	< 0.01	-	0.00148	0.0435
	Arabidopsis thaliana (REF)	Client Text Box Input
GO cellular component complete	#	#	expected	Fold Enrichment	+/-	raw P value	FDR
nuclear speck (GO:0016607)	67	12	2.32	5.17	+	1.21e-05	0.00583
spliceosomal complex (GO:0005681)	100	15	3.47	4.33	+	7.09e-06	0.00684
nuclear body (GO:0016604)	94	14	3.26	4.3	+	1.53e-05	0.00491
nucleus (GO:0005634)	9500	390	329.19	1.18	+	5.88e-05	0.00811
intracellular part (GO:0044424)	19440	732	673.64	1.09	+	3.46e-05	0.00557
intracellular (GO:0005622)	19474	733	674.81	1.09	+	3.4e-05	0.00655
cell part (GO:0044464)	21355	791	739.99	1.07	+	7.1e-05	0.00761
cell (GO:0005623)	21357	791	740.06	1.07	+	7.09e-05	0.00855
extracellular region (GO:0005576)	2840	60	98.41	0.61	-	2.06e-05	0.00497
plant-type cell wall (GO:0009505)	328	1	11.37	0.09	-	0.000295	0.0259
ribosomal subunit (GO:0044391)	275	0	9.53	< 0.01	-	0.000141	0.0136

## Sheet: prp4ka Alt5SS
	Reference list	Client Text Box Input
Mapped IDs:	27502 out of 27502	226 out of 233
Unmapped IDs:	0	5
Multiple mapping information:	0	7
	Arabidopsis thaliana (REF)	Client Text Box Input
PANTHER GO-Slim Biological Process	#	#	expected	Fold Enrichment	+/-	raw P value	FDR
regulation of translation (GO:0006417)	48	4	0.41	9.84	+	0.000958	0.03
RNA splicing, via transesterification reactions (GO:0000375)	202	10	1.71	5.84	+	1.34e-05	0.00252
mRNA splicing, via spliceosome (GO:0000398)	224	10	1.9	5.27	+	3.13e-05	0.00196
mRNA processing (GO:0006397)	310	12	2.63	4.57	+	1.99e-05	0.00187
primary metabolic process (GO:0044238)	5340	69	45.24	1.53	+	0.000233	0.011
metabolic process (GO:0008152)	6924	84	58.66	1.43	+	0.000259	0.00974
	Arabidopsis thaliana (REF)	Client Text Box Input
PANTHER GO-Slim Molecular Function	#	#	expected	Fold Enrichment	+/-	raw P value	FDR
carboxy-lyase activity (GO:0016831)	43	4	0.36	10.98	+	0.000652	0.0341
mRNA binding (GO:0003729)	177	7	1.5	4.67	+	0.000969	0.0381
lyase activity (GO:0016829)	255	9	2.16	4.17	+	0.00042	0.066
binding (GO:0005488)	3418	48	28.96	1.66	+	0.000446	0.035
	Arabidopsis thaliana (REF)	Client Text Box Input
PANTHER Protein Class	#	#	expected	Fold Enrichment	+/-	raw P value	FDR
mRNA splicing factor (PC00148)	150	9	1.27	7.08	+	8.52e-06	0.0015
mRNA processing factor (PC00147)	205	10	1.74	5.76	+	1.51e-05	0.00133
Unclassified (UNCLASSIFIED)	19939	142	168.93	0.84	-	0.00016	0.00939
	Arabidopsis thaliana (REF)	Client Text Box Input
GO cellular component complete	#	#	expected	Fold Enrichment	+/-	raw P value	FDR
interchromatin granule (GO:0035061)	3	2	0.03	78.69	+	0.000691	0.0417
U2-type prespliceosome (GO:0071004)	11	4	0.09	42.92	+	6.16e-06	0.00595
prespliceosome (GO:0071010)	14	4	0.12	33.72	+	1.35e-05	0.00653
U1 snRNP (GO:0005685)	14	4	0.12	33.72	+	1.35e-05	0.00436
U2-type spliceosomal complex (GO:0005684)	21	4	0.18	22.48	+	5.35e-05	0.0129
spliceosomal snRNP complex (GO:0097525)	35	4	0.3	13.49	+	0.000317	0.0306
small nuclear ribonucleoprotein complex (GO:0030532)	36	4	0.3	13.11	+	0.00035	0.0307
Sm-like protein family complex (GO:0120114)	39	4	0.33	12.11	+	0.000463	0.0344
spliceosomal complex (GO:0005681)	100	6	0.85	7.08	+	0.000279	0.0299
nuclear part (GO:0044428)	1030	21	8.73	2.41	+	0.000351	0.0282
intracellular organelle part (GO:0044446)	4617	60	39.12	1.53	+	0.000565	0.039
organelle part (GO:0044422)	4628	60	39.21	1.53	+	0.000579	0.0372
intracellular membrane-bounded organelle (GO:0043231)	17100	173	144.87	1.19	+	0.000134	0.0184
intracellular organelle (GO:0043229)	17402	176	147.43	1.19	+	9.13e-05	0.0176
organelle (GO:0043226)	17411	176	147.51	1.19	+	9.13e-05	0.0147
membrane-bounded organelle (GO:0043227)	17166	173	145.43	1.19	+	0.000174	0.0209

## Sheet: prp4ka Alt3SS
	Reference list	Client Text Box Input
Mapped IDs:	27502 out of 27502	134 out of 134
Unmapped IDs:	0	7
Multiple mapping information:	0	3
	Arabidopsis thaliana (REF)	Client Text Box Input
PANTHER GO-Slim Biological Process	#	#	expected	Fold Enrichment	+/-	raw P value	FDR
RNA splicing, via transesterification reactions (GO:0000375)	202	7	0.98	7.11	+	7.46e-05	0.00701
mRNA splicing, via spliceosome (GO:0000398)	224	7	1.09	6.41	+	0.000139	0.00871
mRNA processing (GO:0006397)	310	8	1.51	5.3	+	0.000167	0.00786
nucleobase-containing compound metabolic process (GO:0006139)	2727	27	13.29	2.03	+	0.000389	0.0122
primary metabolic process (GO:0044238)	5340	44	26.02	1.69	+	0.00026	0.00977
metabolic process (GO:0008152)	6924	56	33.74	1.66	+	3.44e-05	0.00647
Unclassified (UNCLASSIFIED)	18178	70	88.57	0.79	-	0.000955	0.0257
	Arabidopsis thaliana (REF)	Client Text Box Input
PANTHER GO-Slim Molecular Function	#	#	expected	Fold Enrichment	+/-	raw P value	FDR
No statistically significant results
	Arabidopsis thaliana (REF)	Client Text Box Input
PANTHER Protein Class	#	#	expected	Fold Enrichment	+/-	raw P value	FDR
transferase (PC00220)	1342	18	6.54	2.75	+	0.000104	0.0183
	Arabidopsis thaliana (REF)	Client Text Box Input
GO cellular component complete	#	#	expected	Fold Enrichment	+/-	raw P value	FDR
nuclear speck (GO:0016607)	67	7	0.33	21.44	+	7.39e-08	3.57e-05
spliceosomal complex (GO:0005681)	100	9	0.49	18.47	+	3.2e-09	3.08e-06
nuclear body (GO:0016604)	94	7	0.46	15.28	+	6.34e-07	0.000153
nucleoplasm part (GO:0044451)	267	10	1.3	7.69	+	1.06e-06	0.000206
nucleoplasm (GO:0005654)	334	12	1.63	7.37	+	1.32e-07	4.24e-05
cytoplasmic vesicle part (GO:0044433)	216	6	1.05	5.7	+	0.000767	0.0463
nuclear lumen (GO:0031981)	804	15	3.92	3.83	+	1.09e-05	0.000956
intracellular organelle lumen (GO:0070013)	973	18	4.74	3.8	+	1.51e-06	0.000182
membrane-enclosed lumen (GO:0031974)	973	18	4.74	3.8	+	1.51e-06	0.000161
organelle lumen (GO:0043233)	973	18	4.74	3.8	+	1.51e-06	0.000145
intracellular ribonucleoprotein complex (GO:0030529)	689	12	3.36	3.57	+	0.000162	0.0121
ribonucleoprotein complex (GO:1990904)	690	12	3.36	3.57	+	0.000165	0.0113
nuclear part (GO:0044428)	1030	17	5.02	3.39	+	1.31e-05	0.00105
macromolecular complex (GO:0032991)	2355	24	11.47	2.09	+	0.000525	0.0338
intracellular organelle part (GO:0044446)	4617	46	22.5	2.04	+	1.14e-06	0.000183
organelle part (GO:0044422)	4628	46	22.55	2.04	+	1.17e-06	0.000161

## Sheet: prp4ka ES
	Reference list	Client Text Box Input
Mapped IDs:	27502 out of 27502	35 out of 35
Unmapped IDs:	0	2
Multiple mapping information:	0	0
	Arabidopsis thaliana (REF)	Client Text Box Input
PANTHER GO-Slim Biological Process	#	#	expected	Fold Enrichment	+/-	raw P value	FDR
No statistically significant results
	Arabidopsis thaliana (REF)	Client Text Box Input
PANTHER GO-Slim Molecular Function	#	#	expected	Fold Enrichment	+/-	raw P value	FDR
No statistically significant results
	Arabidopsis thaliana (REF)	Client Text Box Input
PANTHER Protein Class	#	#	expected	Fold Enrichment	+/-	raw P value	FDR
No statistically significant results
	Arabidopsis thaliana (REF)	Client Text Box Input
GO cellular component complete	#	#	expected	Fold Enrichment	+/-	raw P value	FDR
nucleoplasm part	267	5	0.34	14.71	+	2.31e-05	0.0223
nucleoplasm	334	5	0.43	11.76	+	6.58e-05	0.0317

## Sheet: prp4ka EI
	Reference list	Client Text Box Input
Mapped IDs:	27502 out of 27502	38 out of 38
Unmapped IDs:	0	0
Multiple mapping information:	0	0
	Arabidopsis thaliana (REF)	Client Text Box Input
PANTHER GO-Slim Biological Process	#	#	expected	Fold Enrichment	+/-	raw P value	FDR
No statistically significant results
	Arabidopsis thaliana (REF)	Client Text Box Input
PANTHER GO-Slim Molecular Function	#	#	expected	Fold Enrichment	+/-	raw P value	FDR
No statistically significant results
	Arabidopsis thaliana (REF)	Client Text Box Input
PANTHER Protein Class	#	#	expected	Fold Enrichment	+/-	raw P value	FDR
No statistically significant results
	Arabidopsis thaliana (REF)	Client Text Box Input
GO cellular component complete	#	#	expected	Fold Enrichment	+/-	raw P value	FDR
No statistically significant results

## Sheet: prp4ka phosphorylation
LOSE and GAIN phosphorylation									LOSE phosphorylation									GAIN phosphorylation
	Reference list	Client Text Box Input								Reference list	Client Text Box Input								Reference list	Client Text Box Input
Mapped IDs:	27502 out of 27502	394 out of 399							Mapped IDs:	27502 out of 27502	182 out of 184							Mapped IDs:	27502 out of 27502	246 out of 249
Unmapped IDs:	0	2							Unmapped IDs:	0	1							Unmapped IDs:	0	1
Multiple mapping information:	0	29							Multiple mapping information:	0	20							Multiple mapping information:	0	9
	Arabidopsis thaliana (REF)	Client Text Box Input								Arabidopsis thaliana (REF)	Client Text Box Input								Arabidopsis thaliana (REF)	Client Text Box Input
PANTHER GO-Slim Biological Process	#	#	expected	Fold Enrichment	+/-	raw P value	FDR		PANTHER GO-Slim Biological Process	#	#	expected	Fold Enrichment	+/-	raw P value	FDR		PANTHER GO-Slim Biological Process	#	#	expected	Fold Enrichment	+/-	raw P value	FDR
induction of apoptosis (GO:0006917)	6	3	0.09	34.46	+	0.000229	0.00154		induction of apoptosis (GO:0006917)	6	2	0.04	49.82	+	0.0012	0.0161		induction of apoptosis (GO:0006917)	6	2	0.05	36.82	+	0.00217	0.014
gluconeogenesis (GO:0006094)	17	7	0.25	28.38	+	3.26e-08	1.02e-06		gluconeogenesis (GO:0006094)	17	4	0.11	35.17	+	1.03e-05	0.000389		gluconeogenesis (GO:0006094)	17	4	0.15	25.99	+	3.36e-05	0.000526
cellular glucose homeostasis (GO:0001678)	13	4	0.19	21.21	+	8.46e-05	0.000795		endocytosis (GO:0006897)	177	9	1.18	7.6	+	4.57e-06	0.000287		cellular glucose homeostasis (GO:0001678)	13	3	0.12	25.49	+	0.000367	0.00276
ferredoxin metabolic process (GO:0006124)	18	3	0.26	11.49	+	0.00319	0.0154		apoptotic process (GO:0006915)	112	5	0.75	6.67	+	0.00113	0.0163		receptor-mediated endocytosis (GO:0006898)	46	6	0.42	14.41	+	7.08e-06	0.00019
receptor-mediated endocytosis (GO:0006898)	46	6	0.67	8.99	+	9.62e-05	0.000861		death (GO:0016265)	121	5	0.81	6.18	+	0.00157	0.0196		regulation of carbohydrate metabolic process (GO:0006109)	34	3	0.31	9.75	+	0.00443	0.0269
regulation of carbohydrate metabolic process (GO:0006109)	34	4	0.49	8.11	+	0.00207	0.0111		cell death (GO:0008219)	121	5	0.81	6.18	+	0.00157	0.0184		endocytosis (GO:0006897)	177	12	1.6	7.49	+	1.56e-07	9.79e-06
endocytosis (GO:0006897)	177	19	2.57	7.4	+	6.92e-11	3.25e-09		RNA splicing, via transesterification reactions (GO:0000375)	202	7	1.35	5.18	+	0.000517	0.0108		RNA localization (GO:0006403)	65	4	0.59	6.8	+	0.00346	0.0217
RNA localization (GO:0006403)	65	5	0.94	5.3	+	0.0033	0.0155		exocytosis (GO:0006887)	146	5	0.98	5.12	+	0.00344	0.034		protein targeting (GO:0006605)	170	9	1.54	5.85	+	3.68e-05	0.000532
nuclear transport (GO:0051169)	119	9	1.73	5.21	+	9.75e-05	0.000833		mRNA processing (GO:0006397)	310	10	2.07	4.82	+	6.01e-05	0.00141		nuclear transport (GO:0051169)	119	6	1.08	5.57	+	0.000947	0.00636
death (GO:0016265)	121	9	1.76	5.13	+	0.00011	0.000898		mRNA splicing, via spliceosome (GO:0000398)	224	7	1.5	4.67	+	0.000931	0.0159		response to abiotic stimulus (GO:0009628)	175	8	1.58	5.05	+	0.000261	0.00213
cell death (GO:0008219)	121	9	1.76	5.13	+	0.00011	0.000861		intracellular protein transport (GO:0006886)	568	16	3.8	4.21	+	2.02e-06	0.000379		mRNA splicing, via spliceosome (GO:0000398)	224	10	2.03	4.93	+	5.45e-05	0.000641
apoptotic process (GO:0006915)	112	8	1.62	4.92	+	0.00034	0.00206		vesicle-mediated transport (GO:0016192)	520	14	3.48	4.02	+	1.47e-05	0.000461		RNA splicing, via transesterification reactions (GO:0000375)	202	9	1.83	4.92	+	0.00013	0.00123
RNA splicing, via transesterification reactions (GO:0000375)	202	14	2.93	4.78	+	3.14e-06	4.92e-05		protein transport (GO:0015031)	600	16	4.01	3.99	+	3.98e-06	0.000374		mRNA processing (GO:0006397)	310	13	2.81	4.63	+	8.02e-06	0.000188
response to abiotic stimulus (GO:0009628)	175	12	2.54	4.73	+	1.75e-05	0.000219		cell cycle (GO:0007049)	532	14	3.56	3.93	+	1.88e-05	0.000505		generation of precursor metabolites and energy (GO:0006091)	263	11	2.38	4.62	+	4.1e-05	0.000514
mRNA splicing, via spliceosome (GO:0000398)	224	15	3.25	4.62	+	2.09e-06	4.37e-05		response to endogenous stimulus (GO:0009719)	321	8	2.15	3.73	+	0.00168	0.0185		death (GO:0016265)	121	5	1.1	4.56	+	0.00566	0.0333
monosaccharide metabolic process (GO:0005996)	108	7	1.57	4.47	+	0.00135	0.00772		cell communication (GO:0007154)	756	14	5.06	2.77	+	0.00067	0.0126		cell death (GO:0008219)	121	5	1.1	4.56	+	0.00566	0.0323
protein targeting (GO:0006605)	170	11	2.47	4.46	+	6.4e-05	0.000633		signal transduction (GO:0007165)	704	12	4.71	2.55	+	0.00314	0.0328		protein transport (GO:0015031)	600	22	5.43	4.05	+	5.54e-08	5.2e-06
mRNA processing (GO:0006397)	310	19	4.5	4.22	+	3.34e-07	7.84e-06		cellular process (GO:0009987)	6866	66	45.94	1.44	+	0.00111	0.0173		vesicle-mediated transport (GO:0016192)	520	18	4.71	3.82	+	2.05e-06	7.7e-05
generation of precursor metabolites and energy (GO:0006091)	263	16	3.82	4.19	+	3.1e-06	5.3e-05		Unclassified (UNCLASSIFIED)	18178	92	121.62	0.76	-	7.48e-06	0.000352		intracellular protein transport (GO:0006886)	568	19	5.14	3.69	+	1.72e-06	8.09e-05
protein transport (GO:0015031)	600	36	8.7	4.14	+	2.9e-12	2.73e-10											protein localization (GO:0008104)	474	15	4.29	3.5	+	4.02e-05	0.00054
intracellular protein transport (GO:0006886)	568	33	8.24	4	+	5.43e-11	3.4e-09			Arabidopsis thaliana (REF)	Client Text Box Input							organelle organization (GO:0006996)	938	21	8.49	2.47	+	0.000167	0.00149
vesicle-mediated transport (GO:0016192)	520	30	7.54	3.98	+	4.93e-10	1.85e-08		PANTHER GO-Slim Molecular Function	#	#	expected	Fold Enrichment	+/-	raw P value	FDR		catabolic process (GO:0009056)	1290	27	11.68	2.31	+	6.42e-05	0.00067
exocytosis (GO:0006887)	146	8	2.12	3.78	+	0.00174	0.00961		non-membrane spanning protein tyrosine kinase activity (GO:0004715)	7	2	0.05	42.7	+	0.00153	0.0268		phosphate-containing compound metabolic process (GO:0006796)	1688	34	15.28	2.22	+	1.52e-05	0.000317
nucleobase-containing compound transport (GO:0015931)	141	7	2.05	3.42	+	0.00555	0.0254		translation factor activity, nucleic acid binding (GO:0008135)	23	3	0.15	19.5	+	0.000671	0.0132		transport (GO:0006810)	1441	29	13.05	2.22	+	7.97e-05	0.000789
protein folding (GO:0006457)	142	7	2.06	3.4	+	0.00575	0.0257		calcium ion binding (GO:0005509)	76	9	0.51	17.7	+	5.54e-09	8.7e-07		cellular component organization (GO:0016043)	1359	27	12.3	2.19	+	0.000176	0.0015
protein localization (GO:0008104)	474	20	6.88	2.91	+	3.45e-05	0.000382		calmodulin binding (GO:0005516)	83	7	0.56	12.61	+	2.4e-06	0.000188		localization (GO:0051179)	1580	31	14.31	2.17	+	5.87e-05	0.000649
regulation of phosphate metabolic process (GO:0019220)	193	8	2.8	2.86	+	0.00862	0.0368		mRNA binding (GO:0003729)	177	9	1.18	7.6	+	4.57e-06	0.000239		response to stimulus (GO:0050896)	1690	31	15.3	2.03	+	0.000277	0.00217
cell cycle (GO:0007049)	532	22	7.72	2.85	+	1.89e-05	0.000223		RNA binding (GO:0003723)	739	14	4.94	2.83	+	0.000539	0.0121		cellular component organization or biogenesis (GO:0071840)	1640	29	14.85	1.95	+	0.000669	0.00466
response to endogenous stimulus (GO:0009719)	321	13	4.66	2.79	+	0.00114	0.0067		protein binding (GO:0005515)	1594	24	10.66	2.25	+	0.000208	0.00545		nucleobase-containing compound metabolic process (GO:0006139)	2727	47	24.69	1.9	+	1.76e-05	0.000331
transport (GO:0006810)	1441	45	20.91	2.15	+	2.5e-06	4.7e-05		binding (GO:0005488)	3418	43	22.87	1.88	+	4.33e-05	0.0017		metabolic process (GO:0008152)	6924	96	62.69	1.53	+	4.66e-06	0.000146
localization (GO:0051179)	1580	47	22.92	2.05	+	4.51e-06	6.52e-05		Unclassified (UNCLASSIFIED)	18253	97	122.12	0.79	-	0.000157	0.00494		cellular process (GO:0009987)	6866	93	62.16	1.5	+	1.79e-05	0.000305
cell communication (GO:0007154)	756	22	10.97	2.01	+	0.00297	0.0147											primary metabolic process (GO:0044238)	5340	71	48.35	1.47	+	0.000528	0.00382
catabolic process (GO:0009056)	1290	36	18.72	1.92	+	0.000304	0.00191			Arabidopsis thaliana (REF)	Client Text Box Input							Unclassified (UNCLASSIFIED)	18178	121	164.58	0.74	-	1.78e-08	3.34e-06
organelle organization (GO:0006996)	938	26	13.61	1.91	+	0.00208	0.0108		PANTHER Protein Class	#	#	expected	Fold Enrichment	+/-	raw P value	FDR
cellular component organization (GO:0016043)	1359	37	19.72	1.88	+	0.000299	0.00194		actin and actin related protein (PC00039)	19	5	0.13	39.33	+	4.71e-07	4.14e-05			Arabidopsis thaliana (REF)	Client Text Box Input
signal transduction (GO:0007165)	704	19	10.21	1.86	+	0.0104	0.0434		intracellular calcium-sensing protein (PC00131)	70	7	0.47	14.95	+	8.3e-07	4.87e-05		PANTHER GO-Slim Molecular Function	#	#	expected	Fold Enrichment	+/-	raw P value	FDR
phosphate-containing compound metabolic process (GO:0006796)	1688	45	24.49	1.84	+	0.000139	0.00104		calmodulin (PC00061)	70	7	0.47	14.95	+	8.3e-07	3.65e-05		translation factor activity, nucleic acid binding (GO:0008135)	23	3	0.21	14.41	+	0.00159	0.0192
response to stimulus (GO:0050896)	1690	45	24.52	1.84	+	0.00014	0.00101		calcium-binding protein (PC00060)	118	9	0.79	11.4	+	1.88e-07	3.31e-05		deacetylase activity (GO:0019213)	34	3	0.31	9.75	+	0.00443	0.0434
nucleobase-containing compound metabolic process (GO:0006139)	2727	66	39.56	1.67	+	4.77e-05	0.000498		mRNA processing factor (PC00147)	205	10	1.37	7.29	+	1.91e-06	6.73e-05		guanyl-nucleotide exchange factor activity (GO:0005085)	76	6	0.69	8.72	+	9.73e-05	0.00218
cellular component organization or biogenesis (GO:0071840)	1640	39	23.79	1.64	+	0.00282	0.0143		mRNA splicing factor (PC00148)	150	7	1	6.98	+	9e-05	0.00198		small GTPase regulator activity (GO:0005083)	100	7	0.91	7.73	+	5.24e-05	0.00137
cellular process (GO:0009987)	6866	150	99.61	1.51	+	3.68e-08	9.89e-07		reductase (PC00198)	257	9	1.72	5.23	+	7.72e-05	0.00194		kinase regulator activity (GO:0019207)	63	4	0.57	7.01	+	0.00312	0.0349
metabolic process (GO:0008152)	6924	142	100.45	1.41	+	5.46e-06	7.34e-05		membrane traffic protein (PC00150)	267	8	1.79	4.48	+	0.000531	0.0104		mRNA binding (GO:0003729)	177	11	1.6	6.86	+	1.16e-06	6.08e-05
primary metabolic process (GO:0044238)	5340	108	77.47	1.39	+	0.000217	0.00151		Unclassified (UNCLASSIFIED)	19939	106	133.4	0.79	-	1.47e-05	0.000432		transcription cofactor activity (GO:0003712)	122	7	1.1	6.34	+	0.00017	0.00333
Unclassified (UNCLASSIFIED)	18178	193	263.73	0.73	-	5.93e-13	1.12e-10											GTPase activity (GO:0003924)	194	10	1.76	5.69	+	1.7e-05	0.000533
ion transport (GO:0006811)	374	0	5.43	< 0.01	-	0.00748	0.0327			Arabidopsis thaliana (REF)	Client Text Box Input							transcription factor binding transcription factor activity (GO:0000989)	255	9	2.31	3.9	+	0.000674	0.0106
									GO cellular component complete	#	#	expected	Fold Enrichment	+/-	raw P value	FDR		protein binding transcription factor activity (GO:0000988)	268	9	2.43	3.71	+	0.000946	0.0135
	Arabidopsis thaliana (REF)	Client Text Box Input							chloroplast ribulose bisphosphate carboxylase complex (GO:0009573)	3	2	0.02	99.64	+	0.000434	0.00988		pyrophosphatase activity (GO:0016462)	609	18	5.51	3.26	+	1.66e-05	0.00065
PANTHER GO-Slim Molecular Function	#	#	expected	Fold Enrichment	+/-	raw P value	FDR		ribulose bisphosphate carboxylase complex (GO:0048492)	3	2	0.02	99.64	+	0.000434	0.00967		enzyme regulator activity (GO:0030234)	407	10	3.68	2.71	+	0.00465	0.043
translation factor activity, nucleic acid binding (GO:0008135)	23	4	0.33	11.99	+	0.000557	0.00795		chromoplast (GO:0009509)	6	2	0.04	49.82	+	0.0012	0.0242		protein binding (GO:0005515)	1594	37	14.43	2.56	+	1.96e-07	3.08e-05
calcium ion binding (GO:0005509)	76	11	1.1	9.98	+	4.72e-08	1.85e-06		nuclear dicing body (GO:0010445)	6	2	0.04	49.82	+	0.0012	0.0238		RNA binding (GO:0003723)	739	17	6.69	2.54	+	0.00052	0.00907
calmodulin binding (GO:0005516)	83	8	1.2	6.64	+	4.93e-05	0.0011		stromule (GO:0010319)	36	5	0.24	20.76	+	7.58e-06	0.00029		binding (GO:0005488)	3418	60	30.95	1.94	+	5.94e-07	4.66e-05
mRNA binding (GO:0003729)	177	16	2.57	6.23	+	2.12e-08	1.11e-06		proteasome core complex (GO:0005839)	25	3	0.17	17.94	+	0.000837	0.0176		hydrolase activity (GO:0016787)	2086	34	18.89	1.8	+	0.00104	0.0137
enzyme activator activity (GO:0008047)	46	4	0.67	5.99	+	0.00565	0.0467		nuclear membrane (GO:0031965)	50	4	0.33	11.96	+	0.000461	0.0101		Unclassified (UNCLASSIFIED)	18253	143	165.26	0.87	-	0.00371	0.0388
small GTPase regulator activity (GO:0005083)	100	8	1.45	5.51	+	0.000165	0.00288		plastoglobule (GO:0010287)	82	5	0.55	9.11	+	0.000292	0.0068
guanyl-nucleotide exchange factor activity (GO:0005085)	76	6	1.1	5.44	+	0.00116	0.0151		thylakoid lumen (GO:0031977)	97	5	0.65	7.7	+	0.000608	0.013
transcription cofactor activity (GO:0003712)	122	7	1.77	3.95	+	0.00261	0.0293		thylakoid (GO:0009579)	591	23	3.95	5.82	+	2.44e-11	6.54e-09			Arabidopsis thaliana (REF)	Client Text Box Input
GTPase activity (GO:0003924)	194	11	2.81	3.91	+	0.000193	0.00303		chloroplast stroma (GO:0009570)	753	26	5.04	5.16	+	1.43e-11	5.11e-09		PANTHER Protein Class	#	#	expected	Fold Enrichment	+/-	raw P value	FDR
nucleotide binding (GO:0000166)	141	7	2.05	3.42	+	0.00555	0.0484		apoplast (GO:0048046)	496	17	3.32	5.12	+	6.66e-08	4.46e-06		major histocompatibility complex antigen (PC00149)	3	2	0.03	73.63	+	0.000788	0.0173
transcription factor binding transcription factor activity (GO:0000989)	255	10	3.7	2.7	+	0.00509	0.047		plastid stroma (GO:0009532)	776	26	5.19	5.01	+	2.71e-11	5.81e-09		carbohydrate phosphatase (PC00066)	6	2	0.05	36.82	+	0.00217	0.0381
RNA binding (GO:0003723)	739	27	10.72	2.52	+	1.85e-05	0.000485		plastid envelope (GO:0009526)	708	22	4.74	4.64	+	3.93e-09	4.68e-07		DNA ligase (PC00012)	6	2	0.05	36.82	+	0.00217	0.0347
pyrophosphatase activity (GO:0016462)	609	22	8.84	2.49	+	0.000128	0.00252		thylakoid membrane (GO:0042651)	428	13	2.86	4.54	+	8.75e-06	0.000323		amino acid kinase (PC00045)	9	2	0.08	24.54	+	0.00418	0.0491
protein binding (GO:0005515)	1594	56	23.13	2.42	+	2.35e-09	1.84e-07		photosynthetic membrane (GO:0034357)	429	13	2.87	4.53	+	8.97e-06	0.00032		vesicle coat protein (PC00235)	61	6	0.55	10.86	+	3.1e-05	0.00182
enzyme regulator activity (GO:0030234)	407	14	5.9	2.37	+	0.00322	0.0337		chloroplast thylakoid membrane (GO:0009535)	407	12	2.72	4.41	+	2.59e-05	0.000817		defense/immunity protein (PC00090)	33	3	0.3	10.04	+	0.0041	0.0515
kinase activity (GO:0016301)	724	21	10.5	2	+	0.00405	0.0398		plastid thylakoid membrane (GO:0055035)	408	12	2.73	4.4	+	2.65e-05	0.000812		chaperone (PC00072)	100	7	0.91	7.73	+	5.24e-05	0.00184
binding (GO:0005488)	3418	95	49.59	1.92	+	6.33e-10	9.95e-08		thylakoid part (GO:0044436)	470	13	3.14	4.13	+	2.28e-05	0.00074		transcription cofactor (PC00217)	64	4	0.58	6.9	+	0.00329	0.0482
catalytic activity (GO:0003824)	5737	110	83.23	1.32	+	0.00154	0.0186		chloroplast envelope (GO:0009941)	688	19	4.6	4.13	+	2.84e-07	1.6e-05		membrane traffic protein (PC00150)	267	15	2.42	6.21	+	4.58e-08	8.06e-06
Unclassified (UNCLASSIFIED)	18253	218	264.82	0.82	-	1.46e-06	4.59e-05		chloroplast thylakoid (GO:0009534)	517	13	3.46	3.76	+	5.9e-05	0.00176		mRNA processing factor (PC00147)	205	11	1.86	5.93	+	4.47e-06	0.000393
									plastid thylakoid (GO:0031976)	518	13	3.47	3.75	+	6.02e-05	0.00174		mRNA splicing factor (PC00148)	150	8	1.36	5.89	+	9.5e-05	0.00279
	Arabidopsis thaliana (REF)	Client Text Box Input							cytosol (GO:0005829)	2289	57	15.31	3.72	+	1.59e-18	1.71e-15		G-protein modulator (PC00022)	135	7	1.22	5.73	+	0.000306	0.0077
PANTHER Protein Class	#	#	expected	Fold Enrichment	+/-	raw P value	FDR		envelope (GO:0031975)	1219	28	8.16	3.43	+	1.68e-08	1.38e-06		translation factor (PC00223)	138	6	1.25	4.8	+	0.00195	0.0382
major histocompatibility complex antigen (PC00149)	3	2	0.04	45.95	+	0.00198	0.0268		organelle envelope (GO:0031967)	1219	28	8.16	3.43	+	1.68e-08	1.28e-06		enzyme modulator (PC00095)	604	13	5.47	2.38	+	0.00403	0.0546
carbohydrate phosphatase (PC00066)	6	2	0.09	22.98	+	0.0054	0.0528		cytoskeleton (GO:0005856)	399	9	2.67	3.37	+	0.00171	0.0327		Unclassified (UNCLASSIFIED)	19939	150	180.53	0.83	-	3.27e-05	0.00144
DNA ligase (PC00012)	6	2	0.09	22.98	+	0.0054	0.05		chloroplast part (GO:0044434)	1431	32	9.57	3.34	+	2.59e-09	3.46e-07
actin and actin related protein (PC00039)	19	5	0.28	18.14	+	1.98e-05	0.000581		plastid part (GO:0044435)	1459	32	9.76	3.28	+	4.08e-09	4.37e-07			Arabidopsis thaliana (REF)	Client Text Box Input
membrane trafficking regulatory protein (PC00151)	35	4	0.51	7.88	+	0.00228	0.0287		plasmodesma (GO:0009506)	1012	19	6.77	2.81	+	6.16e-05	0.00174		GO cellular component complete	#	#	expected	Fold Enrichment	+/-	raw P value	FDR
intracellular calcium-sensing protein (PC00131)	70	7	1.02	6.89	+	0.000118	0.00297		symplast (GO:0055044)	1012	19	6.77	2.81	+	6.16e-05	0.00169		VCP-NPL4-UFD1 AAA ATPase complex (GO:0034098)	3	3	0.03	> 100	+	1.4e-05	0.000483
calmodulin (PC00061)	70	7	1.02	6.89	+	0.000118	0.0026		cell-cell junction (GO:0005911)	1014	19	6.78	2.8	+	6.32e-05	0.00169		nuclear lamina (GO:0005652)	4	2	0.04	55.22	+	0.00117	0.0177
vesicle coat protein (PC00235)	61	6	0.88	6.78	+	0.000394	0.00693		cell junction (GO:0030054)	1014	19	6.78	2.8	+	6.32e-05	0.00165		eukaryotic translation initiation factor 4F complex (GO:0016281)	4	2	0.04	55.22	+	0.00117	0.0175
calcium-binding protein (PC00060)	118	11	1.71	6.43	+	2.62e-06	9.24e-05		vacuole (GO:0005773)	1129	19	7.55	2.52	+	0.000246	0.00585		endoplasmic reticulum Sec complex (GO:0031205)	5	2	0.05	44.18	+	0.00163	0.0219
mRNA splicing factor (PC00148)	150	13	2.18	5.97	+	7.01e-07	3.08e-05		organelle subcompartment (GO:0031984)	1529	24	10.23	2.35	+	0.000128	0.00311		proteasome core complex, alpha-subunit complex (GO:0019773)	10	3	0.09	33.13	+	0.000191	0.00445
mRNA processing factor (PC00147)	205	17	2.97	5.72	+	2.51e-08	1.47e-06		plasma membrane (GO:0005886)	3912	53	26.17	2.02	+	3.82e-07	2.04e-05		light-harvesting complex (GO:0030076)	25	6	0.23	26.51	+	3e-07	1.61e-05
membrane traffic protein (PC00150)	267	21	3.87	5.42	+	1.37e-09	2.41e-07		chloroplast (GO:0009507)	3980	52	26.63	1.95	+	1.5e-06	7.32e-05		rough endoplasmic reticulum (GO:0005791)	9	2	0.08	24.54	+	0.00418	0.0476
chaperone (PC00072)	100	7	1.45	4.82	+	0.000888	0.013		plastid (GO:0009536)	4039	52	27.02	1.92	+	2.96e-06	0.000127		retromer complex (GO:0030904)	9	2	0.08	24.54	+	0.00418	0.0471
G-protein modulator (PC00022)	135	9	1.96	4.6	+	0.000238	0.00466		organelle part (GO:0044422)	5491	67	36.74	1.82	+	2.46e-07	1.46e-05		Cdc73/Paf1 complex (GO:0016593)	9	2	0.08	24.54	+	0.00418	0.0466
translation factor (PC00223)	138	7	2	3.5	+	0.00497	0.0546		cell periphery (GO:0071944)	4562	55	30.52	1.8	+	9.28e-06	0.00032		rough endoplasmic reticulum membrane (GO:0030867)	9	2	0.08	24.54	+	0.00418	0.0462
reductase (PC00198)	257	12	3.73	3.22	+	0.000541	0.00865		intracellular organelle part (GO:0044446)	5484	66	36.69	1.8	+	6.4e-07	3.26e-05		multivesicular body (GO:0005771)	23	4	0.21	19.21	+	9.44e-05	0.00247
enzyme modulator (PC00095)	604	18	8.76	2.05	+	0.00519	0.0537		cytoplasm (GO:0005737)	13346	137	89.29	1.53	+	1.16e-12	6.22e-10		photosystem I (GO:0009522)	41	7	0.37	18.86	+	2.32e-07	1.38e-05
RNA binding protein (PC00031)	1115	29	16.18	1.79	+	0.00309	0.0363		nucleus (GO:0005634)	9858	101	65.95	1.53	+	1.75e-07	1.1e-05		proteasome core complex (GO:0005839)	25	4	0.23	17.67	+	0.000126	0.00307
Unclassified (UNCLASSIFIED)	19939	233	289.28	0.81	-	1.78e-09	1.57e-07		cytoplasmic part (GO:0044444)	10807	109	72.3	1.51	+	5.58e-08	3.99e-06		plastoglobule (GO:0010287)	82	11	0.74	14.82	+	7.76e-10	8.31e-08
									membrane (GO:0016020)	8477	85	56.71	1.5	+	1.35e-05	0.000451		cortical microtubule cytoskeleton (GO:0030981)	26	3	0.24	12.74	+	0.00219	0.0287
									intracellular (GO:0005622)	20080	169	134.34	1.26	+	2.75e-10	4.91e-08		nuclear periphery (GO:0034399)	26	3	0.24	12.74	+	0.00219	0.0283
	Arabidopsis thaliana (REF)	Client Text Box Input							intracellular part (GO:0044424)	20055	168	134.18	1.25	+	9.06e-10	1.39e-07		transcription elongation factor complex (GO:0008023)	26	3	0.24	12.74	+	0.00219	0.028
GO cellular component complete	#	#	expected	Fold Enrichment	+/-	raw P value	FDR		intracellular membrane-bounded organelle (GO:0043231)	17700	148	118.42	1.25	+	2.84e-06	0.000127		histone deacetylase complex (GO:0000118)	28	3	0.25	11.83	+	0.00266	0.0321
VCP-NPL4-UFD1 AAA ATPase complex (GO:0034098)	3	3	0.04	68.93	+	5.62e-05	0.000836		membrane-bounded organelle (GO:0043227)	17800	148	119.09	1.24	+	4.07e-06	0.000162		cortical cytoskeleton (GO:0030863)	31	3	0.28	10.69	+	0.00348	0.0405
chloroplast ribulose bisphosphate carboxylase complex (GO:0009573)	3	2	0.04	45.95	+	0.00198	0.0239		intracellular organelle (GO:0043229)	18054	150	120.79	1.24	+	2.44e-06	0.000113		phragmoplast (GO:0009524)	87	8	0.79	10.16	+	2.33e-06	0.000104
ribulose bisphosphate carboxylase complex (GO:0048492)	3	2	0.04	45.95	+	0.00198	0.0236		organelle (GO:0043226)	18092	150	121.04	1.24	+	3.37e-06	0.000139		photosystem II (GO:0009523)	67	6	0.61	9.89	+	5.06e-05	0.00159
nuclear lamina (GO:0005652)	4	2	0.06	34.46	+	0.00295	0.0325		cell part (GO:0044464)	22071	175	147.66	1.19	+	1.18e-08	1.05e-06		photosystem (GO:0009521)	92	8	0.83	9.6	+	3.43e-06	0.000147
eukaryotic translation initiation factor 4F complex (GO:0016281)	4	2	0.06	34.46	+	0.00295	0.0322		cell (GO:0005623)	22072	175	147.67	1.19	+	1.18e-08	1.15e-06		clathrin-coated vesicle (GO:0030136)	69	6	0.62	9.6	+	5.9e-05	0.00171
proteasome core complex, alpha-subunit complex (GO:0019773)	10	4	0.15	27.57	+	3.68e-05	0.000597		cellular_component (GO:0005575)	25100	181	167.93	1.08	+	0.000105	0.00269		nuclear pore (GO:0005643)	75	6	0.68	8.84	+	9.09e-05	0.00243
endoplasmic reticulum Sec complex (GO:0031205)	5	2	0.07	27.57	+	0.00409	0.0442		intrinsic component of membrane (GO:0031224)	5222	18	34.94	0.52	-	0.000888	0.0183		nuclear membrane (GO:0031965)	50	4	0.45	8.84	+	0.00141	0.0201
proteasome core complex (GO:0005839)	25	6	0.36	16.54	+	4.48e-06	9.23e-05		integral component of membrane (GO:0016021)	4973	17	33.27	0.51	-	0.00138	0.0268		microtubule organizing center (GO:0005815)	58	4	0.53	7.62	+	0.00235	0.0286
light-harvesting complex (GO:0030076)	25	6	0.36	16.54	+	4.48e-06	9.06e-05		Unclassified (UNCLASSIFIED)	2402	3	16.07	0.19	-	0.000105	0.00262		endopeptidase complex (GO:1905369)	91	6	0.82	7.28	+	0.000246	0.0056
plastoglobule (GO:0010287)	82	15	1.19	12.61	+	8.78e-12	4.48e-10											proteasome complex (GO:0000502)	91	6	0.82	7.28	+	0.000246	0.00548
multivesicular body (GO:0005771)	23	4	0.33	11.99	+	0.000557	0.00728											P-body (GO:0000932)	62	4	0.56	7.13	+	0.00295	0.0347
photosystem I (GO:0009522)	41	7	0.59	11.77	+	5.16e-06	0.000102											nuclear envelope (GO:0005635)	142	9	1.29	7	+	9.52e-06	0.000352
stromule (GO:0010319)	36	6	0.52	11.49	+	2.8e-05	0.000461											coated vesicle (GO:0030135)	138	8	1.25	6.4	+	5.45e-05	0.00162
nuclear membrane (GO:0031965)	50	8	0.73	11.03	+	1.67e-06	3.59e-05											peptidase complex (GO:1905368)	114	6	1.03	5.81	+	0.000765	0.0132
nuclear periphery (GO:0034399)	26	4	0.38	10.6	+	0.000841	0.0106											late endosome (GO:0005770)	96	5	0.87	5.75	+	0.0022	0.0277
photosystem II (GO:0009523)	67	8	0.97	8.23	+	1.19e-05	0.000224											cytoskeletal part (GO:0044430)	315	14	2.85	4.91	+	1.88e-06	8.75e-05
photosystem (GO:0009521)	92	10	1.33	7.49	+	2.11e-06	4.44e-05											microtubule cytoskeleton (GO:0015630)	276	12	2.5	4.8	+	1.27e-05	0.000454
nuclear pore (GO:0005643)	75	8	1.09	7.35	+	2.52e-05	0.000436											cytoskeleton (GO:0005856)	399	17	3.61	4.71	+	2.59e-07	1.46e-05
phragmoplast (GO:0009524)	87	9	1.26	7.13	+	9.9e-06	0.000189											extrinsic component of membrane (GO:0019898)	141	6	1.28	4.7	+	0.00217	0.0287
endopeptidase complex (GO:1905369)	91	9	1.32	6.82	+	1.38e-05	0.000255											cytosol (GO:0005829)	2289	91	20.72	4.39	+	1.2e-34	1.28e-31
proteasome complex (GO:0000502)	91	9	1.32	6.82	+	1.38e-05	0.000251											supramolecular polymer (GO:0099081)	213	8	1.93	4.15	+	0.000906	0.0152
nuclear envelope (GO:0005635)	142	14	2.06	6.8	+	6.03e-08	1.79e-06											supramolecular complex (GO:0099080)	213	8	1.93	4.15	+	0.000906	0.0149
clathrin-coated vesicle (GO:0030136)	69	6	1	5.99	+	0.000722	0.00932											polymeric cytoskeletal fiber (GO:0099513)	213	8	1.93	4.15	+	0.000906	0.0147
microtubule organizing center (GO:0005815)	58	5	0.84	5.94	+	0.00208	0.0244											supramolecular fiber (GO:0099512)	213	8	1.93	4.15	+	0.000906	0.0145
P-body (GO:0000932)	62	5	0.9	5.56	+	0.00272	0.0307											membrane protein complex (GO:0098796)	679	24	6.15	3.9	+	2.61e-08	1.86e-06
peptidase complex (GO:1905368)	114	9	1.65	5.44	+	7.17e-05	0.00102											microbody (GO:0042579)	247	8	2.24	3.58	+	0.00224	0.0278
coated vesicle (GO:0030135)	138	10	2	4.99	+	5.66e-05	0.00083											peroxisome (GO:0005777)	247	8	2.24	3.58	+	0.00224	0.0275
thylakoid lumen (GO:0031977)	97	7	1.41	4.97	+	0.000751	0.00957											cytoplasmic vesicle part (GO:0044433)	258	8	2.34	3.42	+	0.0029	0.0345
organelle outer membrane (GO:0031968)	115	8	1.67	4.79	+	0.000402	0.00545											chloroplast thylakoid membrane (GO:0009535)	407	12	3.68	3.26	+	0.00044	0.00872
outer membrane (GO:0019867)	116	8	1.68	4.75	+	0.000424	0.00568											plastid thylakoid membrane (GO:0055035)	408	12	3.69	3.25	+	0.000449	0.00859
cytoskeleton (GO:0005856)	399	25	5.79	4.32	+	3.02e-09	1.11e-07											thylakoid membrane (GO:0042651)	428	12	3.88	3.1	+	0.000676	0.0121
thylakoid (GO:0009579)	591	36	8.57	4.2	+	1.92e-12	1.21e-10											photosynthetic membrane (GO:0034357)	429	12	3.88	3.09	+	0.000689	0.0121
cytosol (GO:0005829)	2289	135	33.21	4.07	+	8.48e-46	9.08e-43											nucleoplasm (GO:0005654)	518	14	4.69	2.99	+	0.000352	0.00725
chloroplast stroma (GO:0009570)	753	43	10.92	3.94	+	9.51e-14	7.83e-12											chloroplast envelope (GO:0009941)	688	18	6.23	2.89	+	7.69e-05	0.00217
extrinsic component of membrane (GO:0019898)	141	8	2.05	3.91	+	0.00141	0.0172											thylakoid part (GO:0044436)	470	12	4.26	2.82	+	0.00147	0.0208
chloroplast thylakoid membrane (GO:0009535)	407	23	5.9	3.9	+	7.77e-08	2.25e-06											vesicle (GO:0031982)	667	17	6.04	2.82	+	0.000165	0.00392
plastid thylakoid membrane (GO:0055035)	408	23	5.92	3.89	+	8.1e-08	2.28e-06											envelope (GO:0031975)	1219	31	11.04	2.81	+	3.27e-07	1.67e-05
thylakoid membrane (GO:0042651)	428	24	6.21	3.87	+	4.63e-08	1.5e-06											organelle envelope (GO:0031967)	1219	31	11.04	2.81	+	3.27e-07	1.59e-05
photosynthetic membrane (GO:0034357)	429	24	6.22	3.86	+	4.83e-08	1.48e-06											plastid envelope (GO:0009526)	708	18	6.41	2.81	+	0.000109	0.00278
plastid stroma (GO:0009532)	776	43	11.26	3.82	+	2.49e-13	1.9e-11											thylakoid (GO:0009579)	591	15	5.35	2.8	+	0.000415	0.00838
apoplast (GO:0048046)	496	27	7.2	3.75	+	1.19e-08	3.97e-07											chloroplast stroma (GO:0009570)	753	19	6.82	2.79	+	7.74e-05	0.00213
plastid envelope (GO:0009526)	708	38	10.27	3.7	+	1.63e-11	7.58e-10											chloroplast thylakoid (GO:0009534)	517	13	4.68	2.78	+	0.00108	0.0168
thylakoid part (GO:0044436)	470	24	6.82	3.52	+	2.38e-07	6.55e-06											plastid thylakoid (GO:0031976)	518	13	4.69	2.77	+	0.0011	0.0168
chloroplast envelope (GO:0009941)	688	35	9.98	3.51	+	4.19e-10	1.8e-08											cytoplasmic vesicle (GO:0031410)	607	15	5.5	2.73	+	0.000543	0.0102
cytoskeletal part (GO:0044430)	315	16	4.57	3.5	+	2.61e-05	0.000437											intracellular vesicle (GO:0097708)	610	15	5.52	2.72	+	0.00057	0.0104
microtubule cytoskeleton (GO:0015630)	276	14	4	3.5	+	8.39e-05	0.00118											plastid stroma (GO:0009532)	776	19	7.03	2.7	+	0.000113	0.00282
spliceosomal complex (GO:0005681)	159	8	2.31	3.47	+	0.00288	0.0321											protein-containing complex (GO:0032991)	3227	68	29.22	2.33	+	3.45e-11	6.17e-09
chloroplast thylakoid (GO:0009534)	517	25	7.5	3.33	+	3.52e-07	9.42e-06											intracellular non-membrane-bounded organelle (GO:0043232)	1721	36	15.58	2.31	+	4.55e-06	0.00018
plastid thylakoid (GO:0031976)	518	25	7.52	3.33	+	3.64e-07	9.51e-06											non-membrane-bounded organelle (GO:0043228)	1721	36	15.58	2.31	+	4.55e-06	0.000174
envelope (GO:0031975)	1219	57	17.69	3.22	+	2.37e-14	2.31e-12											nuclear lumen (GO:0031981)	1105	23	10	2.3	+	0.000261	0.00569
organelle envelope (GO:0031967)	1219	57	17.69	3.22	+	2.37e-14	2.12e-12											nuclear part (GO:0044428)	1448	30	13.11	2.29	+	4.4e-05	0.00147
membrane protein complex (GO:0098796)	679	31	9.85	3.15	+	4.65e-08	1.47e-06											Golgi apparatus (GO:0005794)	1228	23	11.12	2.07	+	0.00108	0.017
supramolecular polymer (GO:0099081)	213	9	3.09	2.91	+	0.00488	0.0512											organelle subcompartment (GO:0031984)	1529	28	13.84	2.02	+	0.000446	0.00869
supramolecular complex (GO:0099080)	213	9	3.09	2.91	+	0.00488	0.0508											intracellular organelle lumen (GO:0070013)	1335	24	12.09	1.99	+	0.00162	0.0225
polymeric cytoskeletal fiber (GO:0099513)	213	9	3.09	2.91	+	0.00488	0.0503											membrane-enclosed lumen (GO:0031974)	1335	24	12.09	1.99	+	0.00162	0.0222
supramolecular fiber (GO:0099512)	213	9	3.09	2.91	+	0.00488	0.0498											organelle lumen (GO:0043233)	1335	24	12.09	1.99	+	0.00162	0.022
nucleoplasm (GO:0005654)	518	21	7.52	2.79	+	3.85e-05	0.000616											endomembrane system (GO:0012505)	2305	41	20.87	1.96	+	4.56e-05	0.00148
microbody (GO:0042579)	247	10	3.58	2.79	+	0.00412	0.0441											chloroplast part (GO:0044434)	1431	24	12.96	1.85	+	0.00388	0.0447
peroxisome (GO:0005777)	247	10	3.58	2.79	+	0.00412	0.0436											plasma membrane (GO:0005886)	3912	63	35.42	1.78	+	4.29e-06	0.000177
chloroplast part (GO:0044434)	1431	54	20.76	2.6	+	3.1e-10	1.38e-08											intracellular organelle part (GO:0044446)	5484	87	49.65	1.75	+	4.22e-08	2.82e-06
plastid part (GO:0044435)	1459	54	21.17	2.55	+	7.9e-10	3.13e-08											organelle part (GO:0044422)	5491	87	49.71	1.75	+	4.33e-08	2.73e-06
plasmodesma (GO:0009506)	1012	36	14.68	2.45	+	1.53e-06	3.57e-05											cell periphery (GO:0071944)	4562	67	41.3	1.62	+	5.1e-05	0.00156
symplast (GO:0055044)	1012	36	14.68	2.45	+	1.53e-06	3.49e-05											chloroplast (GO:0009507)	3980	58	36.03	1.61	+	0.00027	0.00579
cell-cell junction (GO:0005911)	1014	36	14.71	2.45	+	1.59e-06	3.54e-05											cytoplasmic part (GO:0044444)	10807	157	97.85	1.6	+	6.46e-14	1.38e-11
cell junction (GO:0030054)	1014	36	14.71	2.45	+	1.59e-06	3.47e-05											plastid (GO:0009536)	4039	58	36.57	1.59	+	0.000308	0.00647
vesicle (GO:0031982)	667	23	9.68	2.38	+	0.000217	0.00298											nucleus (GO:0005634)	9858	139	89.25	1.56	+	1.8e-10	2.14e-08
cytoplasmic vesicle (GO:0031410)	607	20	8.81	2.27	+	0.000895	0.0112											cytoplasm (GO:0005737)	13346	188	120.83	1.56	+	6.9e-18	3.69e-15
intracellular vesicle (GO:0097708)	610	20	8.85	2.26	+	0.000938	0.0115											membrane (GO:0016020)	8477	103	76.75	1.34	+	0.000543	0.01
nuclear lumen (GO:0031981)	1105	36	16.03	2.25	+	9.8e-06	0.000191											intracellular part (GO:0044424)	20055	231	181.58	1.27	+	3.57e-15	1.28e-12
nuclear part (GO:0044428)	1448	47	21.01	2.24	+	4.5e-07	1.15e-05											intracellular (GO:0005622)	20080	231	181.8	1.27	+	5.63e-15	1.51e-12
organelle subcompartment (GO:0031984)	1529	48	22.18	2.16	+	9e-07	2.14e-05											intracellular organelle (GO:0043229)	18054	206	163.46	1.26	+	3.43e-09	3.34e-07
whole membrane (GO:0098805)	1006	31	14.6	2.12	+	0.000136	0.00188											organelle (GO:0043226)	18092	206	163.8	1.26	+	3.56e-09	3.17e-07
intracellular non-membrane-bounded organelle (GO:0043232)	1721	52	24.97	2.08	+	8.13e-07	2.02e-05											intracellular membrane-bounded organelle (GO:0043231)	17700	201	160.25	1.25	+	2.43e-08	1.86e-06
non-membrane-bounded organelle (GO:0043228)	1721	52	24.97	2.08	+	8.13e-07	1.98e-05											membrane-bounded organelle (GO:0043227)	17800	202	161.16	1.25	+	2.21e-08	1.82e-06
protein-containing complex (GO:0032991)	3227	96	46.82	2.05	+	1.4e-11	6.8e-10											cell part (GO:0044464)	22071	236	199.83	1.18	+	1.01e-10	1.35e-08
intracellular organelle lumen (GO:0070013)	1335	39	19.37	2.01	+	5.49e-05	0.000853											cell (GO:0005623)	22072	236	199.84	1.18	+	1.01e-10	1.54e-08
membrane-enclosed lumen (GO:0031974)	1335	39	19.37	2.01	+	5.49e-05	0.00084											integral component of membrane (GO:0016021)	4973	26	45.02	0.58	-	0.00118	0.0173
organelle lumen (GO:0043233)	1335	39	19.37	2.01	+	5.49e-05	0.000829											intrinsic component of membrane (GO:0031224)	5222	27	47.28	0.57	-	0.000802	0.0136
plasma membrane (GO:0005886)	3912	110	56.76	1.94	+	6.48e-12	3.47e-10											mitochondrion (GO:0005739)	3426	15	31.02	0.48	-	0.00133	0.0192
organelle part (GO:0044422)	5491	148	79.66	1.86	+	4.01e-15	5.37e-13
intracellular organelle part (GO:0044446)	5484	147	79.56	1.85	+	1e-14	1.07e-12
vacuole (GO:0005773)	1129	30	16.38	1.83	+	0.0021	0.0245
chloroplast (GO:0009507)	3980	104	57.74	1.8	+	1.99e-09	7.63e-08
Golgi apparatus (GO:0005794)	1228	32	17.82	1.8	+	0.00211	0.0243
plastid (GO:0009536)	4039	104	58.6	1.77	+	4.1e-09	1.42e-07
bounding membrane of organelle (GO:0098588)	1333	34	19.34	1.76	+	0.00212	0.0241
cell periphery (GO:0071944)	4562	116	66.19	1.75	+	7.69e-10	3.17e-08
endomembrane system (GO:0012505)	2305	58	33.44	1.73	+	5.67e-05	0.00082
organelle membrane (GO:0031090)	1911	47	27.72	1.7	+	0.000496	0.00656
cytoplasmic part (GO:0044444)	10807	245	156.79	1.56	+	1.31e-18	2.8e-16
cytoplasm (GO:0005737)	13346	302	193.62	1.56	+	5.49e-28	2.94e-25
nucleus (GO:0005634)	9858	220	143.02	1.54	+	8.34e-15	9.93e-13
membrane (GO:0016020)	8477	180	122.98	1.46	+	3.02e-09	1.08e-07
intracellular (GO:0005622)	20080	368	291.32	1.26	+	6.67e-22	2.38e-19
intracellular part (GO:0044424)	20055	367	290.96	1.26	+	2.28e-21	6.1e-19
intracellular organelle (GO:0043229)	18054	328	261.93	1.25	+	3.85e-13	2.75e-11
intracellular membrane-bounded organelle (GO:0043231)	17700	321	256.79	1.25	+	4.34e-12	2.45e-10
organelle (GO:0043226)	18092	328	262.48	1.25	+	5.53e-13	3.7e-11
membrane-bounded organelle (GO:0043227)	17800	322	258.24	1.25	+	4.07e-12	2.42e-10
cell part (GO:0044464)	22071	379	320.21	1.18	+	5.11e-17	7.82e-15
cell (GO:0005623)	22072	379	320.22	1.18	+	5.1e-17	9.1e-15
cellular_component (GO:0005575)	25100	386	364.15	1.06	+	2.13e-05	0.000374
integral component of membrane (GO:0016021)	4973	42	72.15	0.58	-	4.33e-05	0.000682
intrinsic component of membrane (GO:0031224)	5222	44	75.76	0.58	-	2.55e-05	0.000433
Unclassified (UNCLASSIFIED)	2402	13	34.85	0.37	-	2.13e-05	0.000381
